# Supplementary material
Source: MDPI journal article supplement (https://www.mdpi.com/2073-4344/12/5/501)
Supplement: s1 [file s1]

# Efficient utilization of hydrocarbon mixture to produce aromatics over Zn/ZSM-5 and physically mixed with ZSM-5

Hyunjin Shim, Jinju Hong and Kyoung-Su Ha\*

Department of Chemical and Biomolecular Engineering, Sogang University, 35 Baekbeom-ro, Mapo-gu, Seoul 04107, Korea

\* Author to whom all correspondence should be addressed.

E-mail address: philoseus@sogang.ac.kr

## List of Contents

**Figure S1.** XRD results of ZSM-5, 0.5Zn/ZSM-5, and 1Zn/ZSM-5.

**Figure S2.** N<sub>2</sub> physisorption isotherm results of ZSM-5, 0.25Zn/ZSM-5, 0.5Zn/ZSM-5 and 1Zn/ZSM-5.

**Figure S3.** Pore size distribution of ZSM-5, 0.25Zn/ZSM-5, 0.5Zn/ZSM-5 and 1Zn/ZSM-5.

**Figure S4.** Aliphatic hydrocarbons selectivity of A: ZSM-5, B: 0.5Zn/ZSM-5, C: 1Zn/ZSM-5, D: ZSM-5 + 0.5Zn/ZSM-5, and E: 0.25Zn/ZSM-5.

**Figure S5.** TG/DTA results of spent (a) ZSM-5, (b) 0.5Zn/ZSM-5, (c) 1Zn/ZSM-5, (d) ZSM-5 + 0.5Zn/ZSM-5, and (e) 0.25Zn/ZSM-5.

**Table S1.** Result of nonthermal plasma-assisted methane conversion.

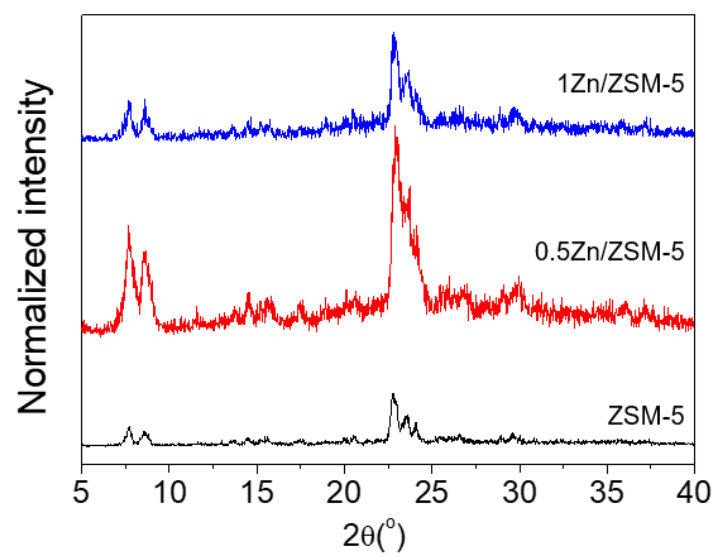

**Figure S1.** XRD results of ZSM-5, 0.5Zn/ZSM-5, and 1Zn/ZSM-5.

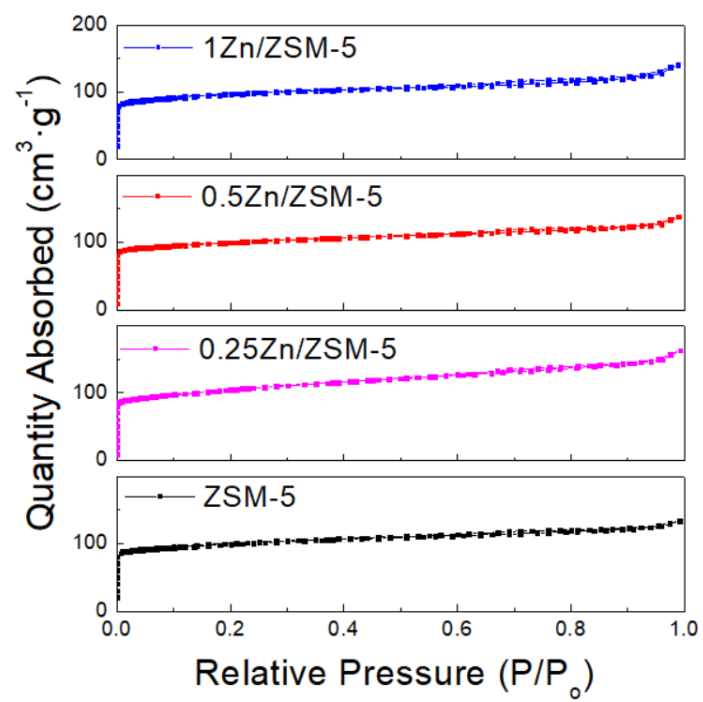

**Figure S2.**  $\text{N}_2$  physisorption isotherm results of ZSM-5, 0.25Zn/ZSM-5, 0.5Zn/ZSM-5 and 1Zn/ZSM-5.

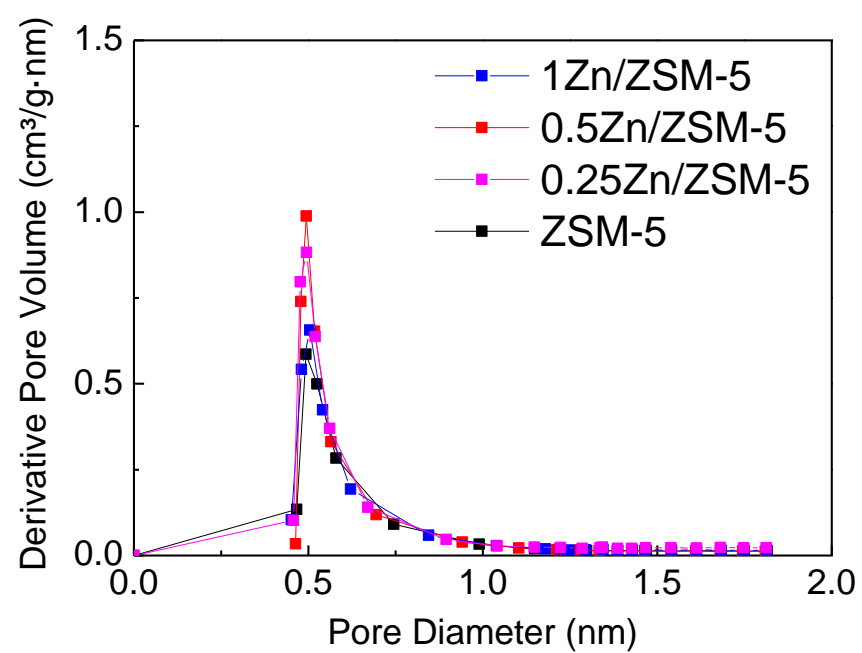

**Figure S3.** Pore size distribution of ZSM-5, 0.25Zn/ZSM-5, 0.5Zn/ZSM-5 and 1Zn/ZSM-5.

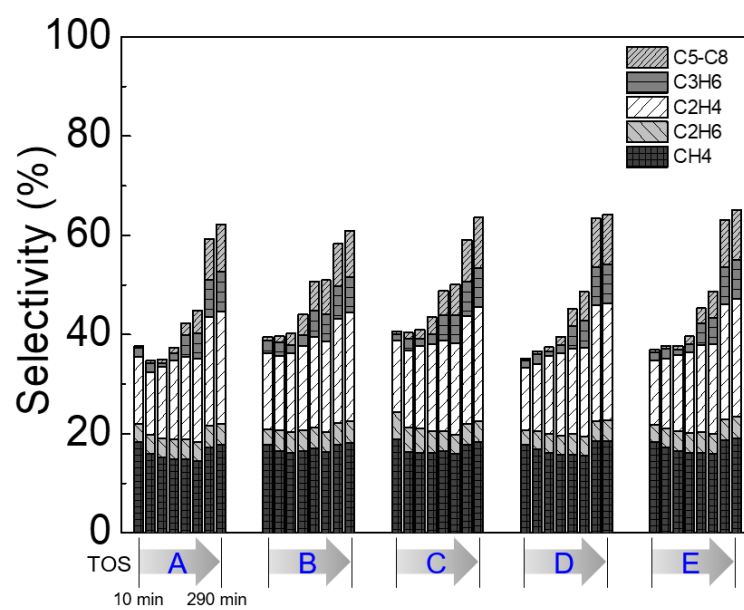

**Figure S4.** Aliphatic hydrocarbons selectivity of A: ZSM-5, B: 0.5Zn/ZSM-5, C: 1Zn/ZSM-5, D: ZSM-5 + 0.5Zn/ZSM-5, and E: 0.25Zn/ZSM-5.

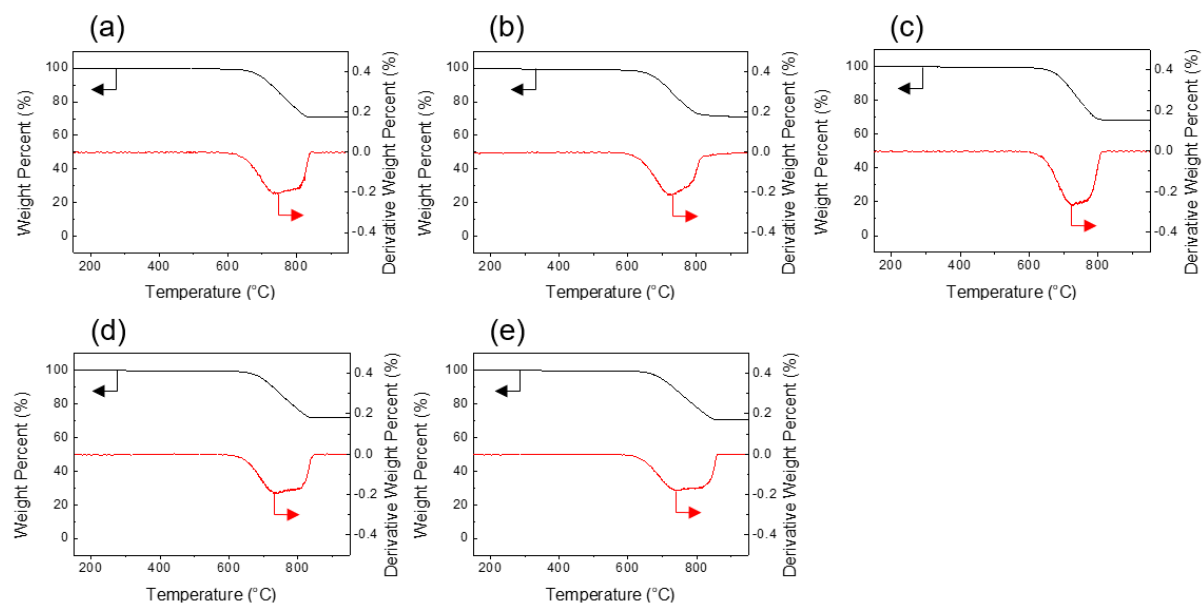

**Figure S5.** TG/DTA results of spent (a) ZSM-5, (b) 0.5Zn/ZSM-5, (c) 1Zn/ZSM-5, (d) ZSM-5 + 0.5Zn/ZSM-5, and (e) 0.25Zn/ZSM-5.

**Table S1.** Result of nonthermal plasma-assisted methane conversion.

| Catalysts                                    | Me-<br>thane<br>Conver-<br>sion<br>(%) | Selectivity (%) |                               |                               |                               |                |                | C <sub>2</sub> -<br>C <sub>4</sub><br>Yiel<br>d<br>(%) |
|----------------------------------------------|----------------------------------------|-----------------|-------------------------------|-------------------------------|-------------------------------|----------------|----------------|--------------------------------------------------------|
|                                              |                                        | H <sub>2</sub>  | C <sub>2</sub> H <sub>2</sub> | C <sub>2</sub> H <sub>4</sub> | C <sub>2</sub> H <sub>6</sub> | C <sub>3</sub> | C <sub>4</sub> |                                                        |
| $\alpha$ -Al <sub>2</sub> O <sub>3</sub> (S) | 54.8                                   | 57.0            | 46.5                          | 7.00                          | 10.4                          | 7.48           | 25.2           | 53.0                                                   |
